# Supplementary material for: Influence of substituent on equilibrium of benzoxazine synthesis from Mannich base and formaldehyde
Source: Royal Society of Chemistry journal article supplement (doi:10.1039/c4cp02053g), 2014-01-01
Supplement: c4cp02053g1.pdf [file c4cp02053g1.pdf]

# Influence of substituent on Equilibrium of benzoxazine synthesis from Mannich Base and formaldehyde

*Yuyuan Deng, Qin Zhang, Qianhao Zhou, Chengxi Zhang, Rongqi Zhu, Yi Gu\**

State Key Laboratory of Polymer Materials Engineering, College of Polymer Science  
and Engineering, Sichuan University, Chengdu, Sichuan 610065, PR China

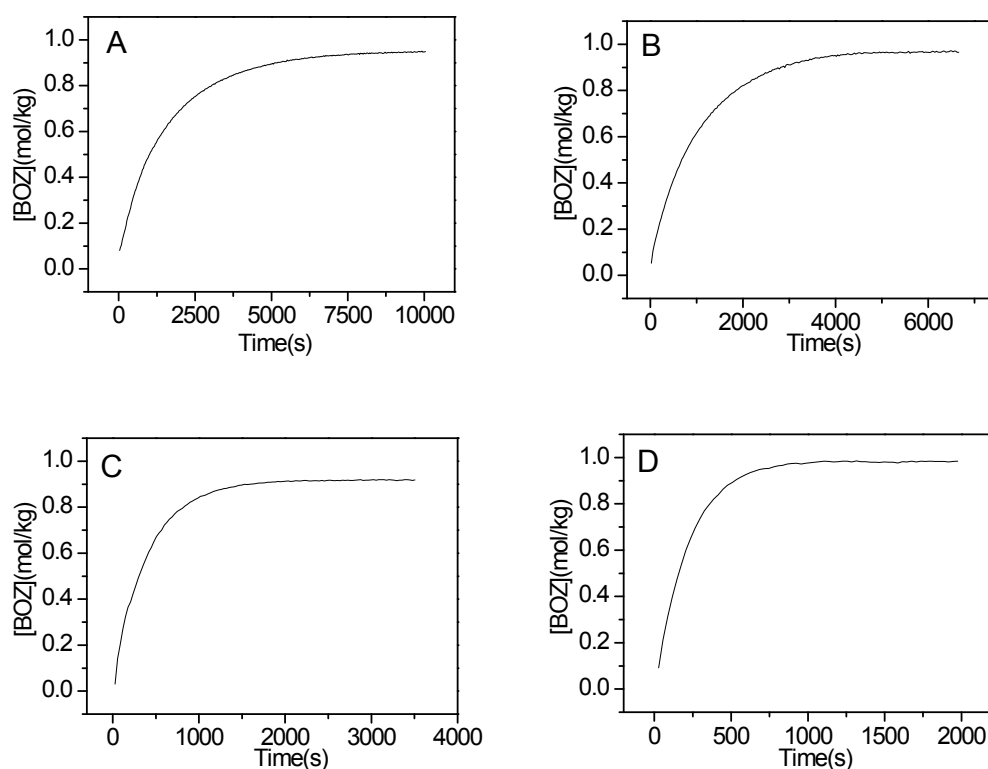

**Figure S1. Concentrations of benzoxazine versus time by in situ IR ([MB]<sub>0</sub>=1.0 mol/kg, [F]<sub>0</sub>=1.0mol/kg). A. 34 °C; B.40 °C; C.52 °C ; D. 63 °C**

In this paper, the reaction time of Mannich base and formaldehyde at 50 °C, 60 °C, 70 °C and 80 °C is 6 h, 4 h, 4 h and 2 h, respectively. According to Figure S1, the reaction time is long enough to reach equilibrium.
